# Supplementary material for: Sensitive rGO/MOF based electrochemical sensor for penta-chlorophenol detection: a novel artificial neural network (ANN) application
Source: Royal Society of Chemistry journal article supplement (doi:10.1039/d2sd00100d), 2022-01-01
Supplement: d2sd00100d1.pdf [file d2sd00100d1.pdf]

## Electronic Supplementary Materials (ESM)

### *Sensitive rGO/MOF based electrochemical sensor for Penta-chlorophenol detection: A Novel Artificial Neural Network (ANN) Application.*

**Hicham Meskher**<sup>1,\*</sup>, **Fethi Achi**<sup>1</sup>, and **Sohmyung Ha**<sup>2,3</sup>, **Bahria Berregui**<sup>1</sup>, **Fatiha Babanini**<sup>1</sup>, **Hakim Belkhalfa**<sup>4</sup>.

*1 Laboratory of Valorization and Promotion of Saharian Ressources (VPSR), Kasdi-Merbah University, Ouargla, 30000, Algeria*

*2 Division of Engineering, New York University Abu Dhabi, Abu Dhabi 129188, UAE.*

*3 Tandon School of Engineering, New York University, New York, NY 11201, USA.*

*4 Centre de Recherche Scientifique et Technique en Analyses Physico-chimiques (CRAPC), Bou-Ismaïl, Alegria.*

\* Corresponding author.

E-mail addresses: [hicham.meskher@gmail.com](mailto:hicham.meskher@gmail.com), [hicham.meskher@g.enp.edu.dz](mailto:hicham.meskher@g.enp.edu.dz) (M. Hicham).

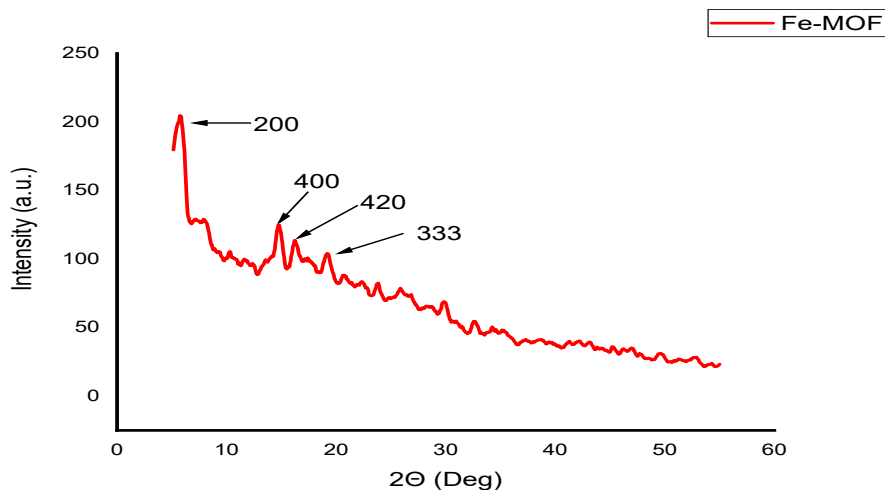

**Fig. S1** XRD fragments of the synthesized Fe-MOF.

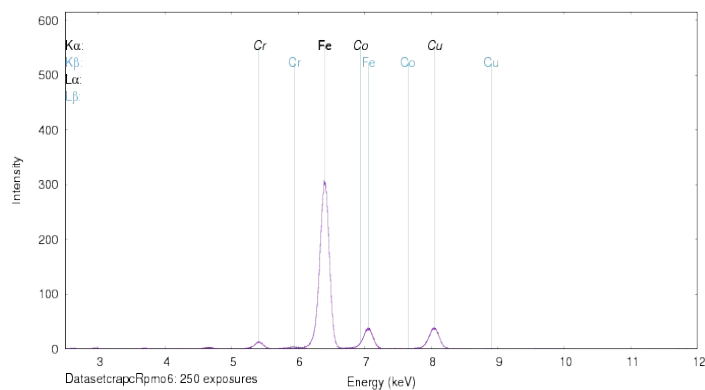

**Fig. S2** XRF patterns of the synthesized Fe-MOF.

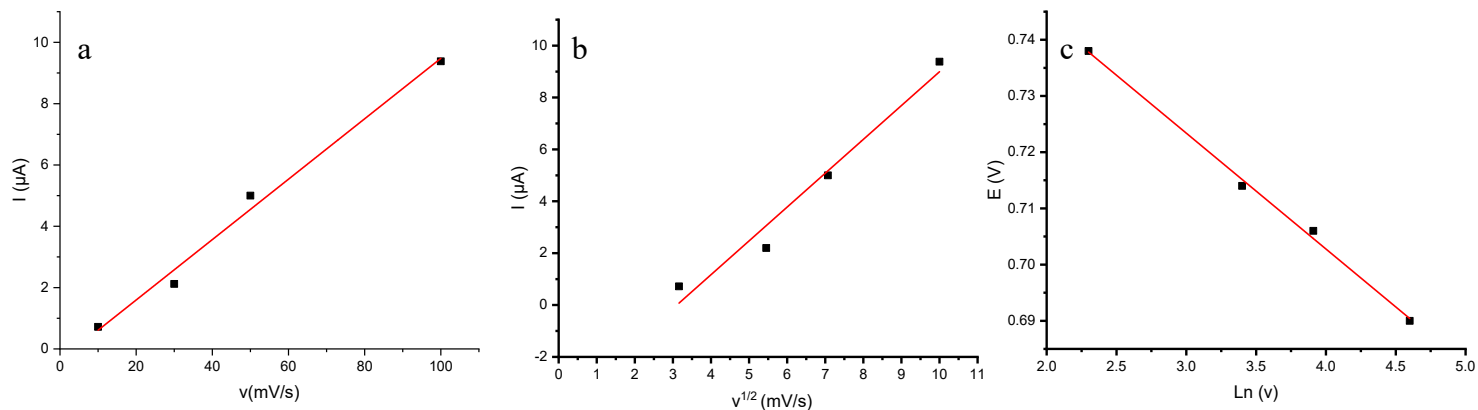

**Fig. S3** Plots of peak current versus scan rates (A), (scan rates)<sup>1/2</sup> (B) (10–100 mV/s), and relationship between E and ln(v) (C) for 100 μM PCP.
